# Supplementary material for: Assessment of Vitamin D Status in Slovenian Premenopausal and Postmenopausal Women, Using Total, Free, and Bioavailable 25-Hydroxyvitamin D (25(OH)D)
Source: MDPI journal article supplement (doi:10.3390/nu14245349), 2022-12-16
Supplement: s1 [file s1]

**SURVEY QUESTIONNAIRE:**

**DETERMINATION OF VITAMIN D STATUS IN**

**PERIMENOPAUSAL AND POSTMENOPAUSAL WOMEN**

|  |  |  |  |  |
|--|--|--|--|--|
|  |  |  |  |  |
|--|--|--|--|--|

**A – GENERAL**

|                                |  |  |
|--------------------------------|--|--|
| Name                           |  |  |
| Surname                        |  |  |
| Age                            |  |  |
| Body mass                      |  |  |
| Body height                    |  |  |
| City of residence (no address) |  |  |
| Phone Number                   |  |  |
| E-mail                         |  |  |

**B– HEALTH INFORMATION**

|    |                                                                                                              |  |
|----|--------------------------------------------------------------------------------------------------------------|--|
| 1. | In the last 12 months, have you been treated for thyroid disease (receiving medication, radioactive iodine)? |  |
|    | a) NO<br>b) YES                                                                                              |  |

|    |                           |  |
|----|---------------------------|--|
| 2. | Have you ever had cancer? |  |
|    | a) NO<br>b) YES           |  |

|    |                                                     |  |
|----|-----------------------------------------------------|--|
| 3. | Have you been diagnosed with osteoporosis?          |  |
|    | a) NO<br>b) NO, just reduced bone density<br>c) YES |  |

|    |                                                                                                                                                                      |  |
|----|----------------------------------------------------------------------------------------------------------------------------------------------------------------------|--|
| 4. | Do you have any of the following conditions: Crohn's disease, ulcerative colitis, celiac disease, gastric bypass surgery, or chronic kidney disease (stages 3 to 5). |  |
|    | a) NO<br>b) YES                                                                                                                                                      |  |

|    |                                                                                                             |  |
|----|-------------------------------------------------------------------------------------------------------------|--|
| 5. | Have you received corticosteroid pills or injections in the last 12 months? Examples: Medrol, Dexamethasone |  |
|    | a) NO<br>b) YES                                                                                             |  |

|    |                                                                                                                              |  |
|----|------------------------------------------------------------------------------------------------------------------------------|--|
| 6. | Have you recovered from COVID19?                                                                                             |  |
|    | a) YES, confirmed by test<br>b) YES, I had symptoms of infection, without confirmation with a test<br>c) NO<br>d) Other_____ |  |

**C – INFORMATION ON MENSTRUAL CYCLE**

|    |                                                                                                                                                                                                                                                                                                                                                                                                                                                                                                                                                                                                                                                                                                                                          |  |
|----|------------------------------------------------------------------------------------------------------------------------------------------------------------------------------------------------------------------------------------------------------------------------------------------------------------------------------------------------------------------------------------------------------------------------------------------------------------------------------------------------------------------------------------------------------------------------------------------------------------------------------------------------------------------------------------------------------------------------------------------|--|
| 1. | Which statement best describes your <b>current</b> menstrual state?                                                                                                                                                                                                                                                                                                                                                                                                                                                                                                                                                                                                                                                                      |  |
|    | <p>a) My periods have become <u>irregular</u> in recent years or months. The time between two periods is now longer or shorter than before, the periods are stronger or weaker than before.</p> <p>b) I have <u>regular</u> periods.</p> <p>c) I'm on birth control.</p> <p>d) I don't have periods anymore, I'm in menopause. Date of my last period: ____/____/____ (at least a year).</p> <p>e) I have been through menopause, however I am currently on hormone replacement therapy. Date of my last period: ____/____/____ (at least a year).</p> <p>f) I had a surgical procedure which caused my periods to stop.</p> <p>g) I've had chemotherapy or radiotherapy which has caused my periods to stop.</p> <p>h) Other: _____</p> |  |
| 2. | How old were you when your menstruation began?                                                                                                                                                                                                                                                                                                                                                                                                                                                                                                                                                                                                                                                                                           |  |
|    | <p>_____ years</p>                                                                                                                                                                                                                                                                                                                                                                                                                                                                                                                                                                                                                                                                                                                       |  |
| 3. | What is your menstruation like <b>currently</b> (in the last 12 months):                                                                                                                                                                                                                                                                                                                                                                                                                                                                                                                                                                                                                                                                 |  |
|    | <p>a) How many days are there between two menstruations? _____</p> <p>b) How many days does menstruation last? _____</p> <p>Any peculiarities: _____</p> <p>c) I don't have menstruation</p>                                                                                                                                                                                                                                                                                                                                                                                                                                                                                                                                             |  |

**D - VITAMIN D INFORMATION**

|    |                                                                                                                                                                                                                                                                                           |  |
|----|-------------------------------------------------------------------------------------------------------------------------------------------------------------------------------------------------------------------------------------------------------------------------------------------|--|
| 1. | Has the 2020 COVID 19 epidemic affected your intake of vitamin D from dietary supplements or medicines?                                                                                                                                                                                   |  |
|    | <p>a) I did not take vitamin D supplements or medicines before March 2020, now I do.</p> <p>b) I have taken vitamin D before March 2020 and now I take a higher dose.</p> <p>c) It had no effect.</p> <p>d) I was taking vitamin D before March 2020, but now I don't take it anymore</p> |  |
| 2. | Do you take vitamin D supplements?                                                                                                                                                                                                                                                        |  |
|    | <p>a) NO</p> <p>b) YES</p> <p>Product Name: _____ Dose: _____</p> <p>Product Name: _____ Dose: _____</p>                                                                                                                                                                                  |  |
| 3. | Do you take medicines with vitamin D, e.g. Plivit D3, Oleovit D3, Vitamin D Krka 1000 IE or another?                                                                                                                                                                                      |  |
|    | <p>a) NO</p> <p>b) YES</p> <p>Product Name: _____ Dose: _____</p> <p>Product Name: _____ Dose: _____</p>                                                                                                                                                                                  |  |
| 4. | Do you take multivitamin supplements or supplements for immunity or <u>any other nutritional supplements</u> ?                                                                                                                                                                            |  |
|    | <p>a) NO</p> <p>b) YES</p> <p>Product Name: _____ Dose: _____</p> <p>Product Name: _____ Dose: _____</p>                                                                                                                                                                                  |  |

**E – BEHAVIORAL FACTORS**

|    |                                                                                                                                                                                                                                                                                                                                                                                                                                                                                                                                                                                                                                                                                                                                                                                                            |  |
|----|------------------------------------------------------------------------------------------------------------------------------------------------------------------------------------------------------------------------------------------------------------------------------------------------------------------------------------------------------------------------------------------------------------------------------------------------------------------------------------------------------------------------------------------------------------------------------------------------------------------------------------------------------------------------------------------------------------------------------------------------------------------------------------------------------------|--|
| 1. | Which statement best describes your skin type?                                                                                                                                                                                                                                                                                                                                                                                                                                                                                                                                                                                                                                                                                                                                                             |  |
|    | <p>a) The sun burns me very quickly, I never tan. My skin is pale, and possibly freckled. I have red or blonde hair. I have light eye color (green, blue).</p> <p>b) The sun burns me quickly, I tan very little. I have light hair (blonde or light brown). My skin is fair. I have light eye color (green, blue).</p> <p>c) The sun burns me sometimes, but I get an even tan. My skin is fair (when not tanned). I have light or dark eye color.</p> <p>d) The sun rarely burns me, I tan quickly and evenly. My skin is light brown (when not tanned). I have dark eye color.</p> <p>e) The sun rarely burns me, I tan very quickly and evenly. My skin is dark brown. I have dark eye color.</p> <p>f) The sun never burns me, my skin is very dark brown to almost black. I have dark eye color.</p> |  |

|    |                                                                                                          |  |
|----|----------------------------------------------------------------------------------------------------------|--|
| 2. | Have you tanned (due to sun exposure) in the last 12 months?                                             |  |
|    | <p>a) NO</p> <p>b) YES, all over the body</p> <p>c) YES, especially on exposed areas: face and hands</p> |  |

|    |                                                                                                            |  |
|----|------------------------------------------------------------------------------------------------------------|--|
| 3. | Do you use sunscreen?                                                                                      |  |
|    | <p>a) NO, never</p> <p>b) YES</p> <p>c) YES, but only during prolonged sun exposure (beach, mountains)</p> |  |

|    |                                                                                                                                                               |  |
|----|---------------------------------------------------------------------------------------------------------------------------------------------------------------|--|
| 4. | How much time did you spend outdoors on an average day in the last 7 days?                                                                                    |  |
|    | a) less than 5 minutes a day<br>b) 5 to 15 minutes a day<br>c) 15 to 30 minutes a day<br>d) 30 to 60 minutes a day<br>e) 60 minutes or more<br>f) Other:_____ |  |

|    |                                                    |  |
|----|----------------------------------------------------|--|
| 5. | Have you used a tanning bed in the last 12 months? |  |
|    | a) NO<br>b) YES                                    |  |

|    |                                                                                                                    |  |
|----|--------------------------------------------------------------------------------------------------------------------|--|
| 6. | How often do you use make-up or SPF cream?                                                                         |  |
|    | a) never<br>b) less than 1 day per week<br>c) 2 to 3 days a week<br>d) 4 to 5 days a week<br>e) 6 to 7 days a week |  |

|    |                                                                                                                                                                                                                                                                                                                                                                                                                                                                                                                                                                                                                                                                              |  |
|----|------------------------------------------------------------------------------------------------------------------------------------------------------------------------------------------------------------------------------------------------------------------------------------------------------------------------------------------------------------------------------------------------------------------------------------------------------------------------------------------------------------------------------------------------------------------------------------------------------------------------------------------------------------------------------|--|
| 7. | Which statement best describes your sun tanning habits?                                                                                                                                                                                                                                                                                                                                                                                                                                                                                                                                                                                                                      |  |
|    | a) I avoid the sun <u>almost completely</u> ; I don't tan in the summer, I spend a lot of time indoors.<br><br>b) even in summer I <u>tan only slightly</u> , I regularly use sunscreen .<br><br>c) I don't expose myself to the sun on purpose, but I protect myself when the sun is strong and I'm exposed for a long time. In the summer <u>I tan mostly on exposed areas</u> (face, hands, part of the legs); at the beach or in the mountains I almost always use sunscreen.<br><br>d) <u>I spend a lot of time in the sun</u> . In the summertime I regularly sunbathe and get quite a tan. I work outdoors (e.g. agricultural work). I don't use sunscreen regularly. |  |

**F – NUTRITIONAL FACTORS**

The first two questions are about fish. Read the descriptions carefully, as fish species vary greatly in composition. Fill in **only one** (the most appropriate) box.

|    |                                                                                                                                                |  |
|----|------------------------------------------------------------------------------------------------------------------------------------------------|--|
| 1. | How often have you eaten sardines, tuna, salmon, mackerel, trout, herring, or other oily fish, in the last 12 months? <u>Ignore lean fish.</u> |  |
|----|------------------------------------------------------------------------------------------------------------------------------------------------|--|

|                       |   |   |   |   |   |
|-----------------------|---|---|---|---|---|
| How many times a week |   |   |   |   |   |
| 1                     | 2 | 3 | 4 | 5 | 6 |

|                          |   |   |   |
|--------------------------|---|---|---|
| How many times per month |   |   |   |
| ≤1                       | 2 | 3 | 4 |

|    |                                                                                                                                  |  |
|----|----------------------------------------------------------------------------------------------------------------------------------|--|
| 2. | How often have you eaten sea bass, sea bream, hake, cod, whiting, common dentex, sole or other lean fish, in the last 12 months? |  |
|----|----------------------------------------------------------------------------------------------------------------------------------|--|

|                       |   |   |   |   |   |
|-----------------------|---|---|---|---|---|
| How many times a week |   |   |   |   |   |
| 1                     | 2 | 3 | 4 | 5 | 6 |

|         |   |   |   |
|---------|---|---|---|
| a month |   |   |   |
| ≤1      | 2 | 3 | 4 |

|                                                                                                                                                                                                         |                                                      |  |
|---------------------------------------------------------------------------------------------------------------------------------------------------------------------------------------------------------|------------------------------------------------------|--|
| 3.                                                                                                                                                                                                      | How often have you eaten eggs in the last 12 months? |  |
| a) I do not consume eggs or <1 egg per week<br>b) 1 egg per week<br>c) 2 eggs per week<br>d) 3 eggs per week<br>e) 4 eggs per week<br>f) 5 eggs per week<br>g) 6 or more eggs per week. How much? _____ |                                                      |  |

|    |                                                                                                                                                                                                                                                      |
|----|------------------------------------------------------------------------------------------------------------------------------------------------------------------------------------------------------------------------------------------------------|
| 4. | How often have you consumed milk and liquid dairy products (yogurt, kefir, sour milk) in the last 12 months? Also consider milk in coffee and dishes.<br><u>Fill in <b>only one</b> of the boxes and mark the amount you drink on this occasion.</u> |
|----|------------------------------------------------------------------------------------------------------------------------------------------------------------------------------------------------------------------------------------------------------|

|                      |   |   |   |
|----------------------|---|---|---|
| How many times a day |   |   |   |
| ≤1                   | 2 | 3 | 4 |

|                       |   |   |   |   |   |
|-----------------------|---|---|---|---|---|
| How many times a week |   |   |   |   |   |
| 1                     | 2 | 3 | 4 | 5 | 6 |

|                        |   |   |    |
|------------------------|---|---|----|
| How many times a month |   |   |    |
| 1                      | 2 | 3 | ≥4 |

|                                                                                                                  |  |
|------------------------------------------------------------------------------------------------------------------|--|
| How much milk do you drink at once, on average?                                                                  |  |
| a) approx. 0.5 dl<br>b) 1 dl (half cup)<br>c) 1.5 dl<br>d) 2 dl (cup)<br>e) 3 dl<br>f) 4 dl<br>g) more: _____ dl |  |

|    |                                                                                                                                                                           |
|----|---------------------------------------------------------------------------------------------------------------------------------------------------------------------------|
| 5. | How often have you eaten cheese or cottage cheese in the last 12 months?<br><u>Fill in <b>only one</b> of the boxes and mark the amount you consume on this occasion.</u> |
|----|---------------------------------------------------------------------------------------------------------------------------------------------------------------------------|

|                      |   |   |   |
|----------------------|---|---|---|
| How many times a day |   |   |   |
| ≤1                   | 2 | 3 | 4 |

|                       |   |   |   |   |   |
|-----------------------|---|---|---|---|---|
| How many times a week |   |   |   |   |   |
| 1                     | 2 | 3 | 4 | 5 | 6 |

|                        |   |   |    |
|------------------------|---|---|----|
| How many times a month |   |   |    |
| 1                      | 2 | 3 | ≥4 |

|                                                                                    |  |
|------------------------------------------------------------------------------------|--|
| How much cheese and cottage cheese do you eat at once, on average?                 |  |
| a) 15 g<br>b) 30 g<br>c) 45 g<br>d) 60 g<br>e) 75 g<br>f) 90 g<br>g) more, _____ g |  |

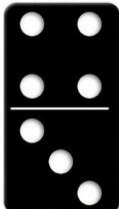

*Keep in mind that the weight of a domino-sized slice of cheese is about 30 g.*



## G – LIFESTYLE FACTORS AND OTHER

|    |                                                                                                                                                                                                                                                                                             |  |
|----|---------------------------------------------------------------------------------------------------------------------------------------------------------------------------------------------------------------------------------------------------------------------------------------------|--|
| 1. | What is your highest level of education?                                                                                                                                                                                                                                                    |  |
|    | <ul style="list-style-type: none"> <li>a) incomplete primary education</li> <li>b) primary education</li> <li>c) high school</li> <li>d) higher vocational college</li> <li>e) bachelor's or equivalent</li> <li>f) master's or equivalent</li> <li>g) specialization, doctorate</li> </ul> |  |
| 2. | What social group (or class) do you belong to?                                                                                                                                                                                                                                              |  |
|    | <ul style="list-style-type: none"> <li>a) lower class</li> <li>b) working class</li> <li>c) middle class</li> <li>d) upper middle class</li> <li>e) upper class</li> <li>f) I do not know</li> </ul>                                                                                        |  |
| 3. | Do you currently smoke or have you ever smoked (cigarettes, cigars or pipe tobacco)?                                                                                                                                                                                                        |  |
|    | <ul style="list-style-type: none"> <li>a) I don't smoke and have never smoked</li> <li>b) I smoke now</li> <li>c) I don't smoke now, but I used to smoke</li> </ul>                                                                                                                         |  |

|    |                                                                                                                                                                                                                                                                                                                                                                                                                           |  |
|----|---------------------------------------------------------------------------------------------------------------------------------------------------------------------------------------------------------------------------------------------------------------------------------------------------------------------------------------------------------------------------------------------------------------------------|--|
| 4. | How physically active are you at work?                                                                                                                                                                                                                                                                                                                                                                                    |  |
|    | <p>a) I am not employed (retired, housewife, unemployed)</p> <p>b) I sit most of the time (office work)</p> <p>c) I spend most of my time standing, but the work is not very physically demanding (e.g. saleswoman, hairdresser, security, laboratory technician)</p> <p>d) My job is physically demanding and involves lifting heavy objects, using tools and machinery (e.g. nurse, gardener, assembly line worker)</p> |  |

|    |                                                                                                         |                             |  |
|----|---------------------------------------------------------------------------------------------------------|-----------------------------|--|
| 5. | In the last 12 months, how many hours <u>per week</u> did <u>you</u> spend on the following activities? |                             |  |
| a) | Planned physical activity: swimming, running, aerobics, fitness, tennis, etc.                           | _____hours,<br>_____minutes |  |
| b) | Cycling                                                                                                 | _____hours,<br>_____minutes |  |
| c) | Walking                                                                                                 | _____hours,<br>_____minutes |  |
| d) | Housework, childcare                                                                                    | _____hours,<br>_____minutes |  |

*We sincerely thank you for your cooperation!*
